# Supplementary material for: Wnt5a‐Ror2 signaling in mesenchymal stem cells promotes proliferation of gastric cancer cells by activating CXCL16–CXCR6 axis
Source: PubMed Central journal article supplement — Cancer Sci. 2016 Feb 9;107(3):290–7. doi: 10.1111/cas.12871 (PMC4814243; doi:10.1111/cas.12871), 2016-02-09
Supplement: CAS-107-290-s001.pdf [file CAS-107-290-s001.pdf]

**Figure S1**

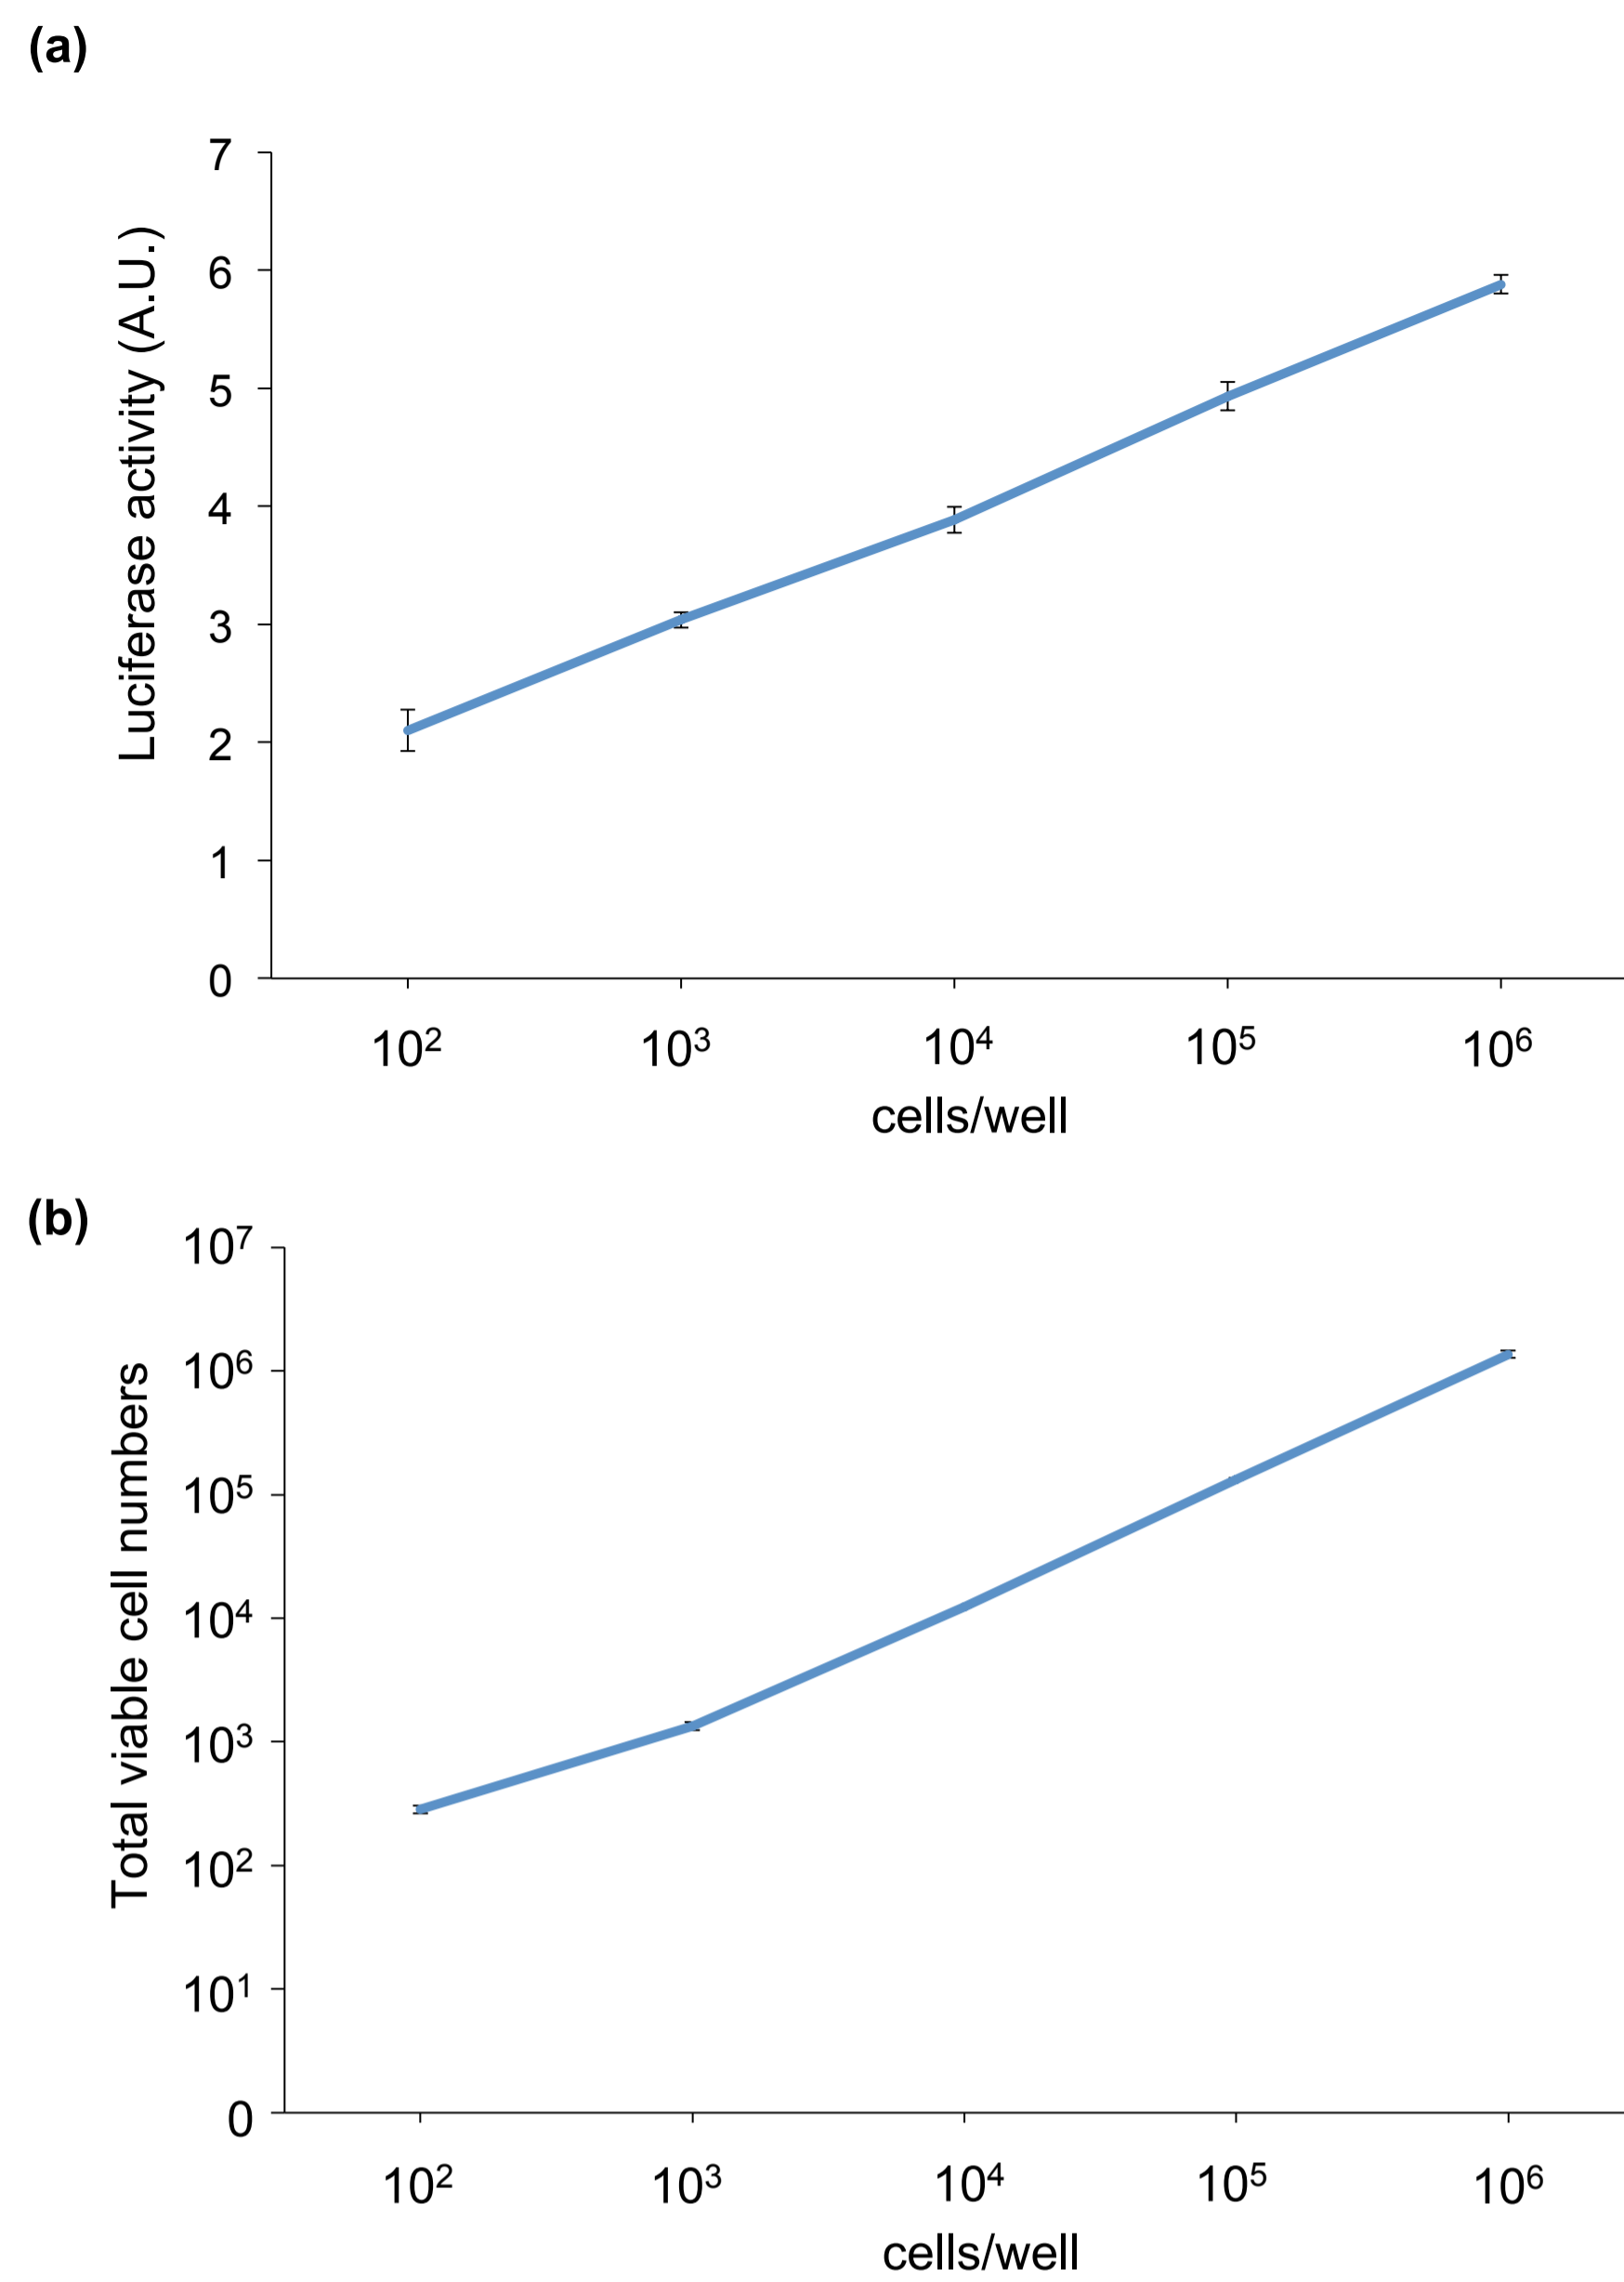

Figure S1. Cell densities in culture do not affect proliferation rates of MKN45-Luc cells. MKN45-Luc cells were cultured at the indicated densities in a 12-well plate. After 12 h in culture, luciferase activities (a) and total viable cell numbers (b) were measured. Data are expressed as mean  $\pm$  SD (n = 3).

Figure S2

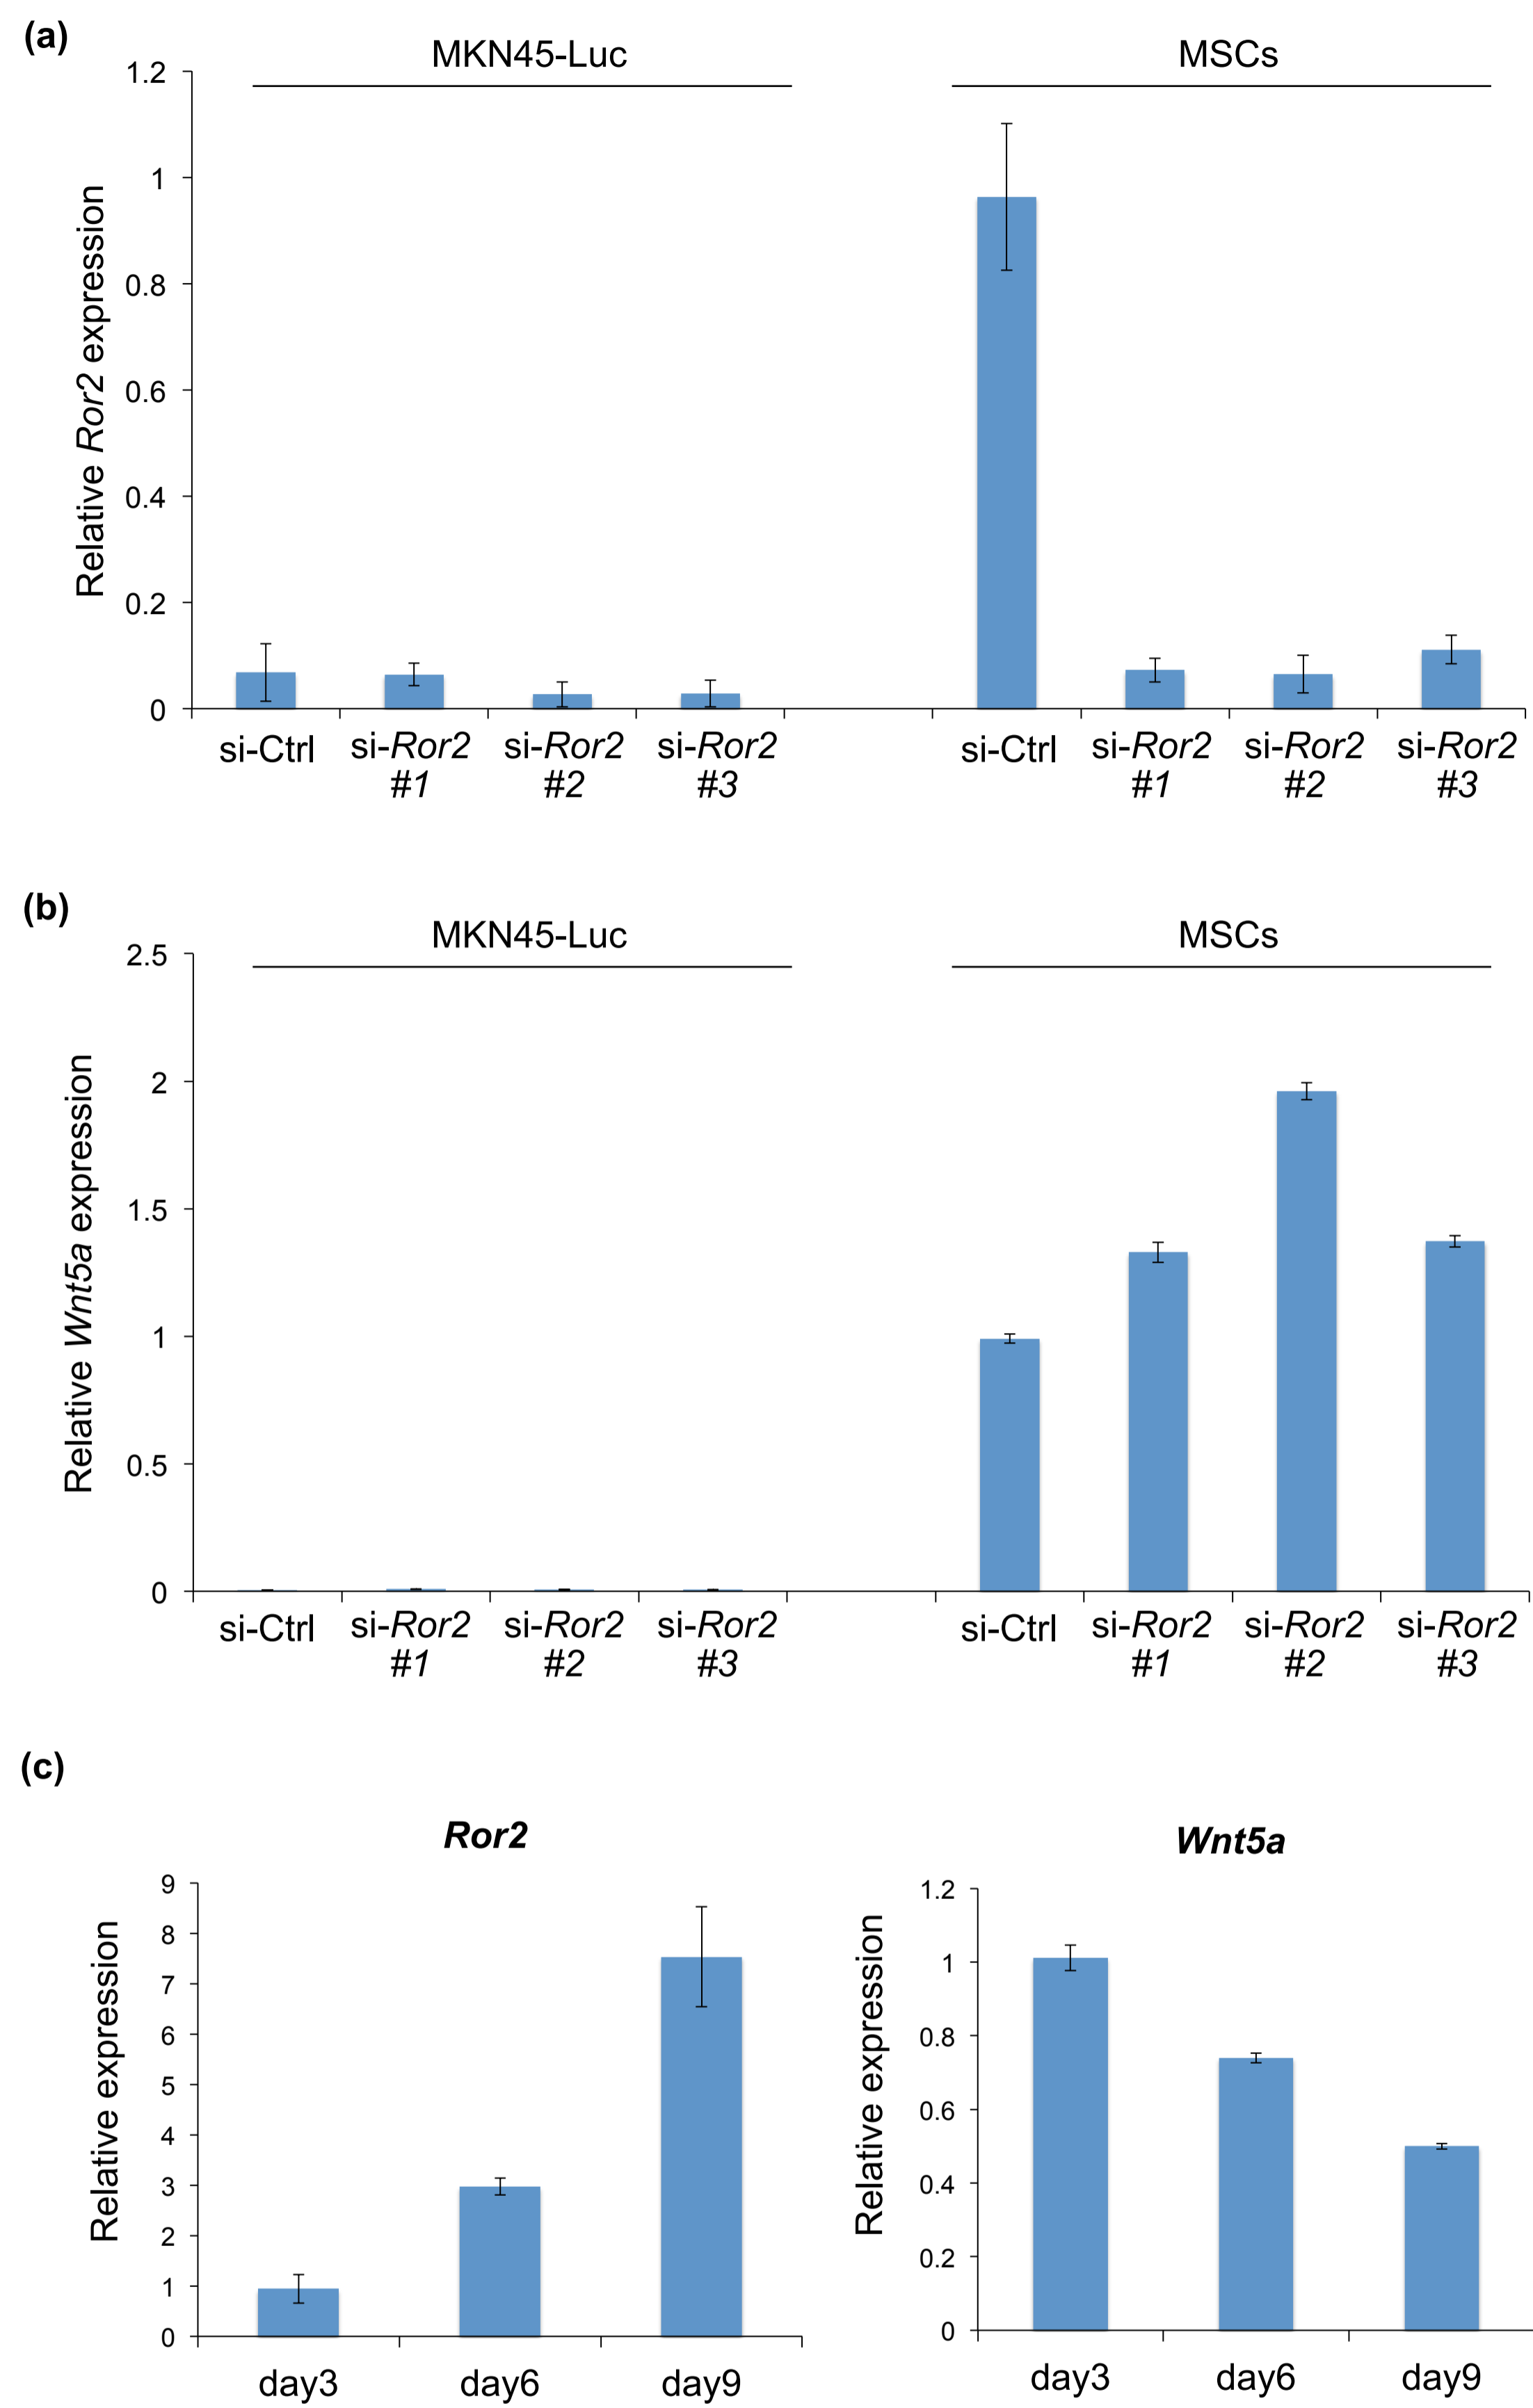

Figure S2. Expression levels of *Ror2* and *Wnt5a* in MKN45-Luc cells and MSCs. MKN45-Luc cells and MSCs were transfected with either *ctrl* siRNA or three different siRNAs against *Ror2* (#1, #2, #3). After 6 days in culture, mRNA levels of *Ror2* (a) and *Wnt5a* (b) were measured by quantitative RT-PCR analyses. (c) Temporal expression patterns of *Ror2* and *Wnt5a* in MSCs cultured singly were measured by quantitative RT-PCR analyses.

Figure S3

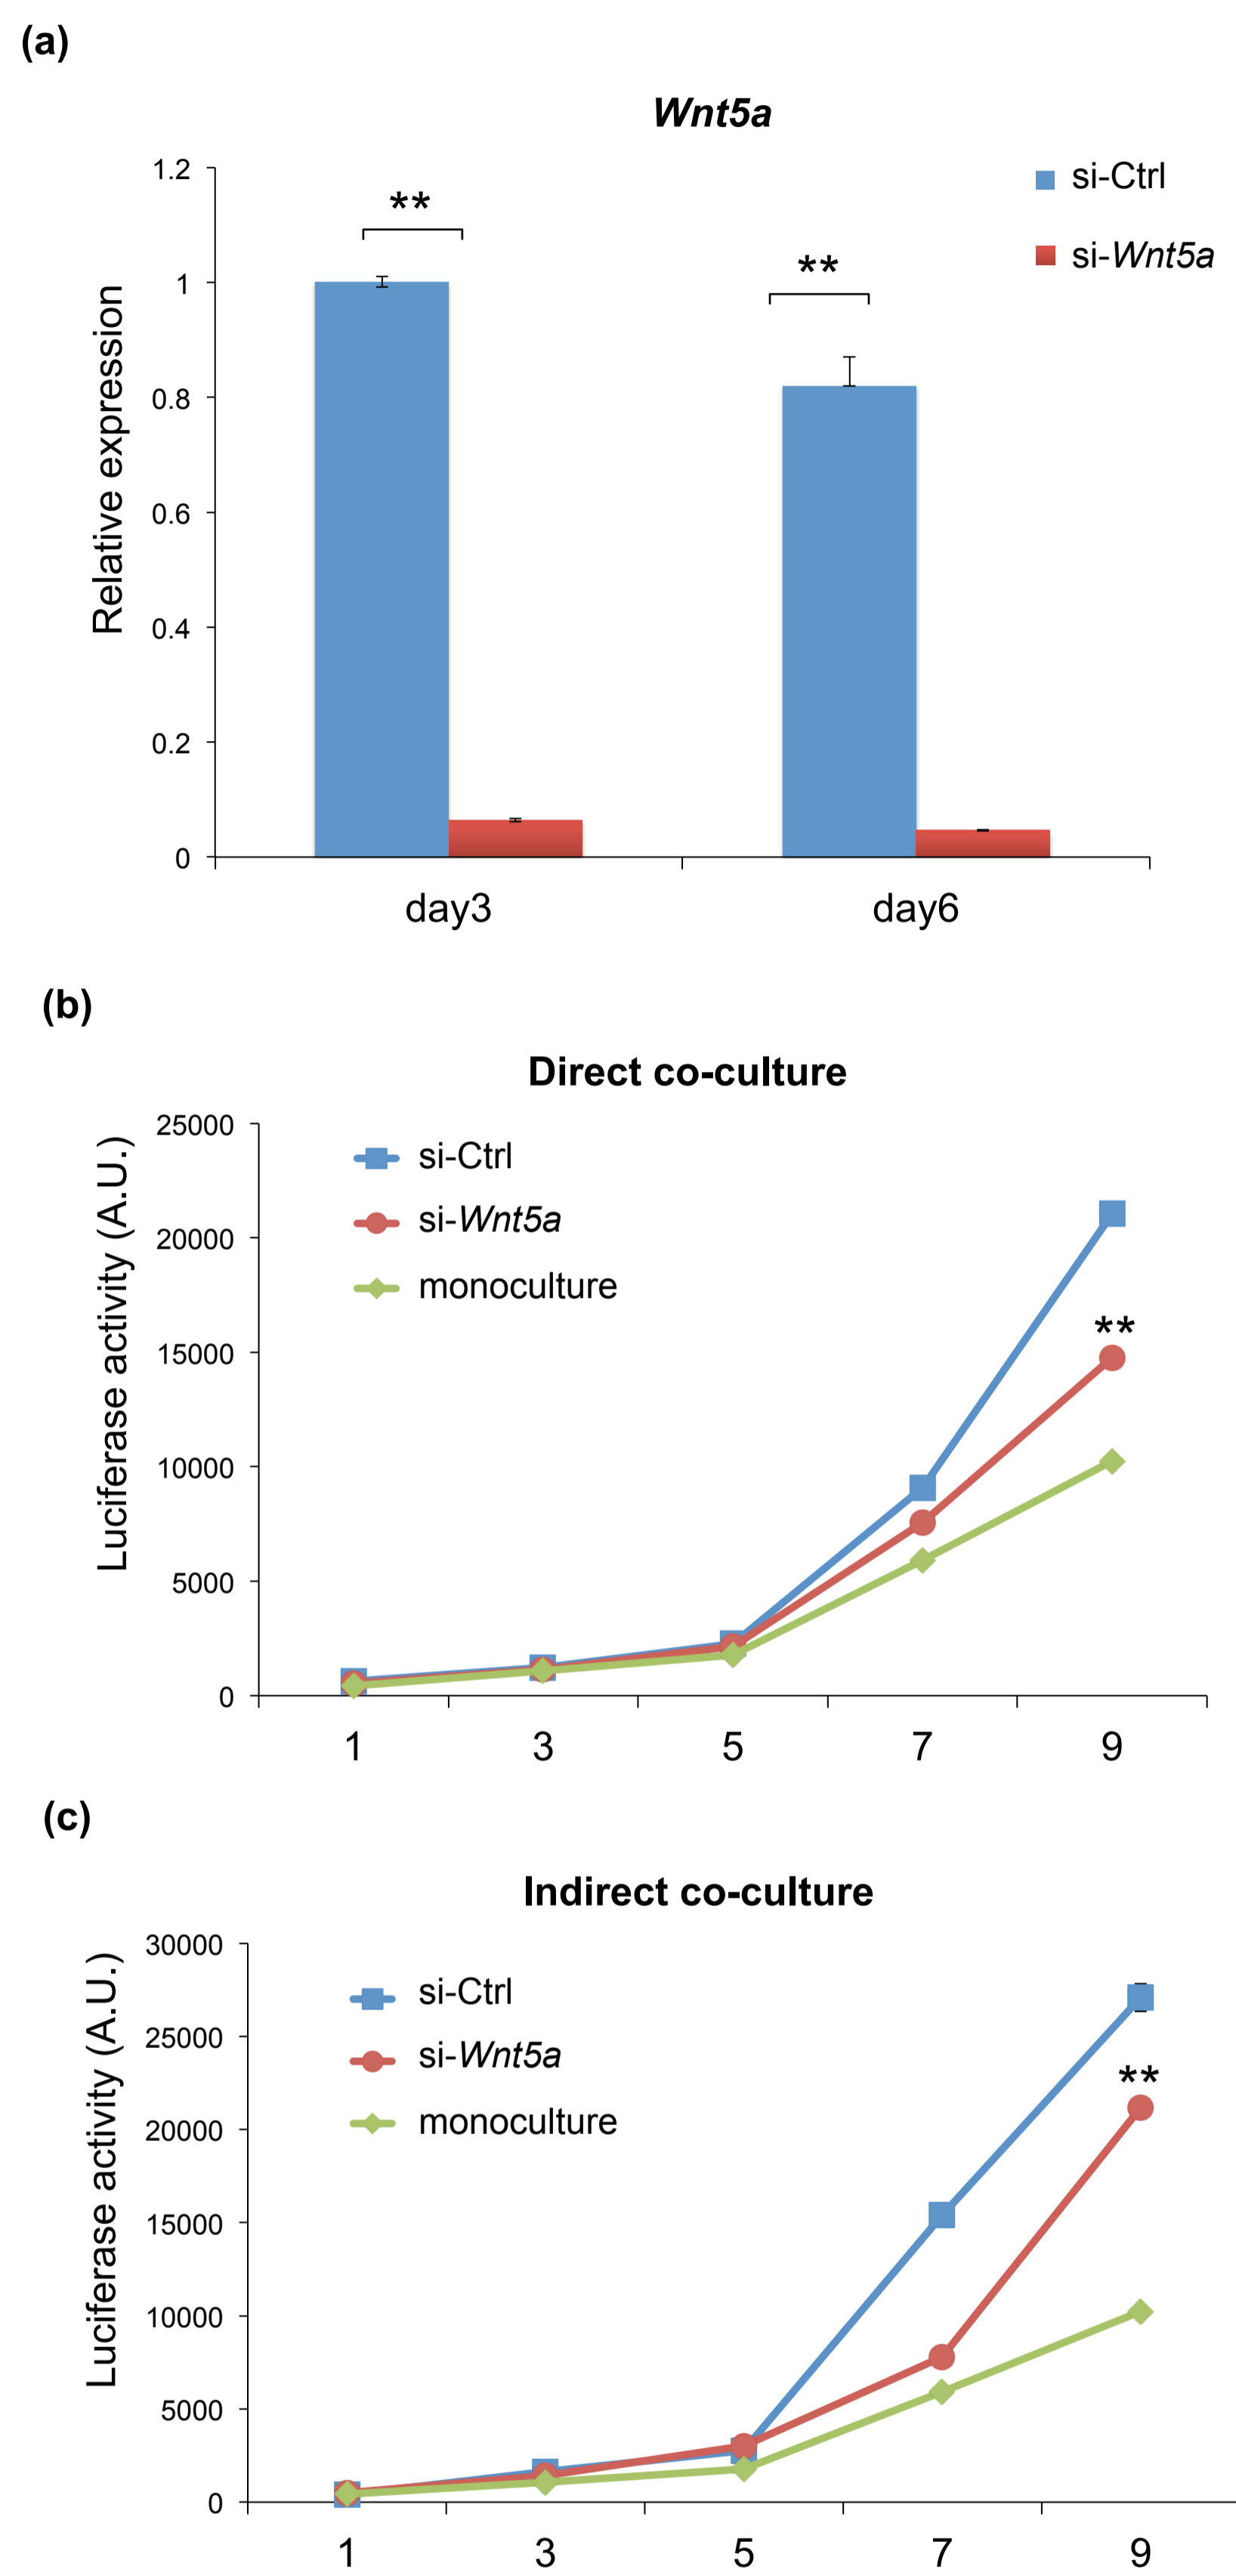

Figure S3. Expression of *Wnt5a* in MSCs is required for the ability of MSCs to promote proliferation of MKN45-Luc cells in culture. (a) Suppressed expression of *Wnt5a* in MSCs treated with siRNA for *Wnt5a*. MSCs were transfected with either *ctrl* siRNA or siRNA against *Wnt5a*, and cultured for 3 or 6 days. Expression levels of *Wnt5a* mRNA were measured by quantitative RT-PCR analyses. (b, c) MKN45-Luc cells were cultured singly (mono-culture) or co-cultured with siRNA-transfected MSCs either directly (b) or indirectly (c). Luciferase activities were measured at the indicated time points. Data are expressed as mean  $\pm$  SD ( $n = 3$ ; \*\*,  $P < 0.001$ ,  $t$  test).

Figure S4

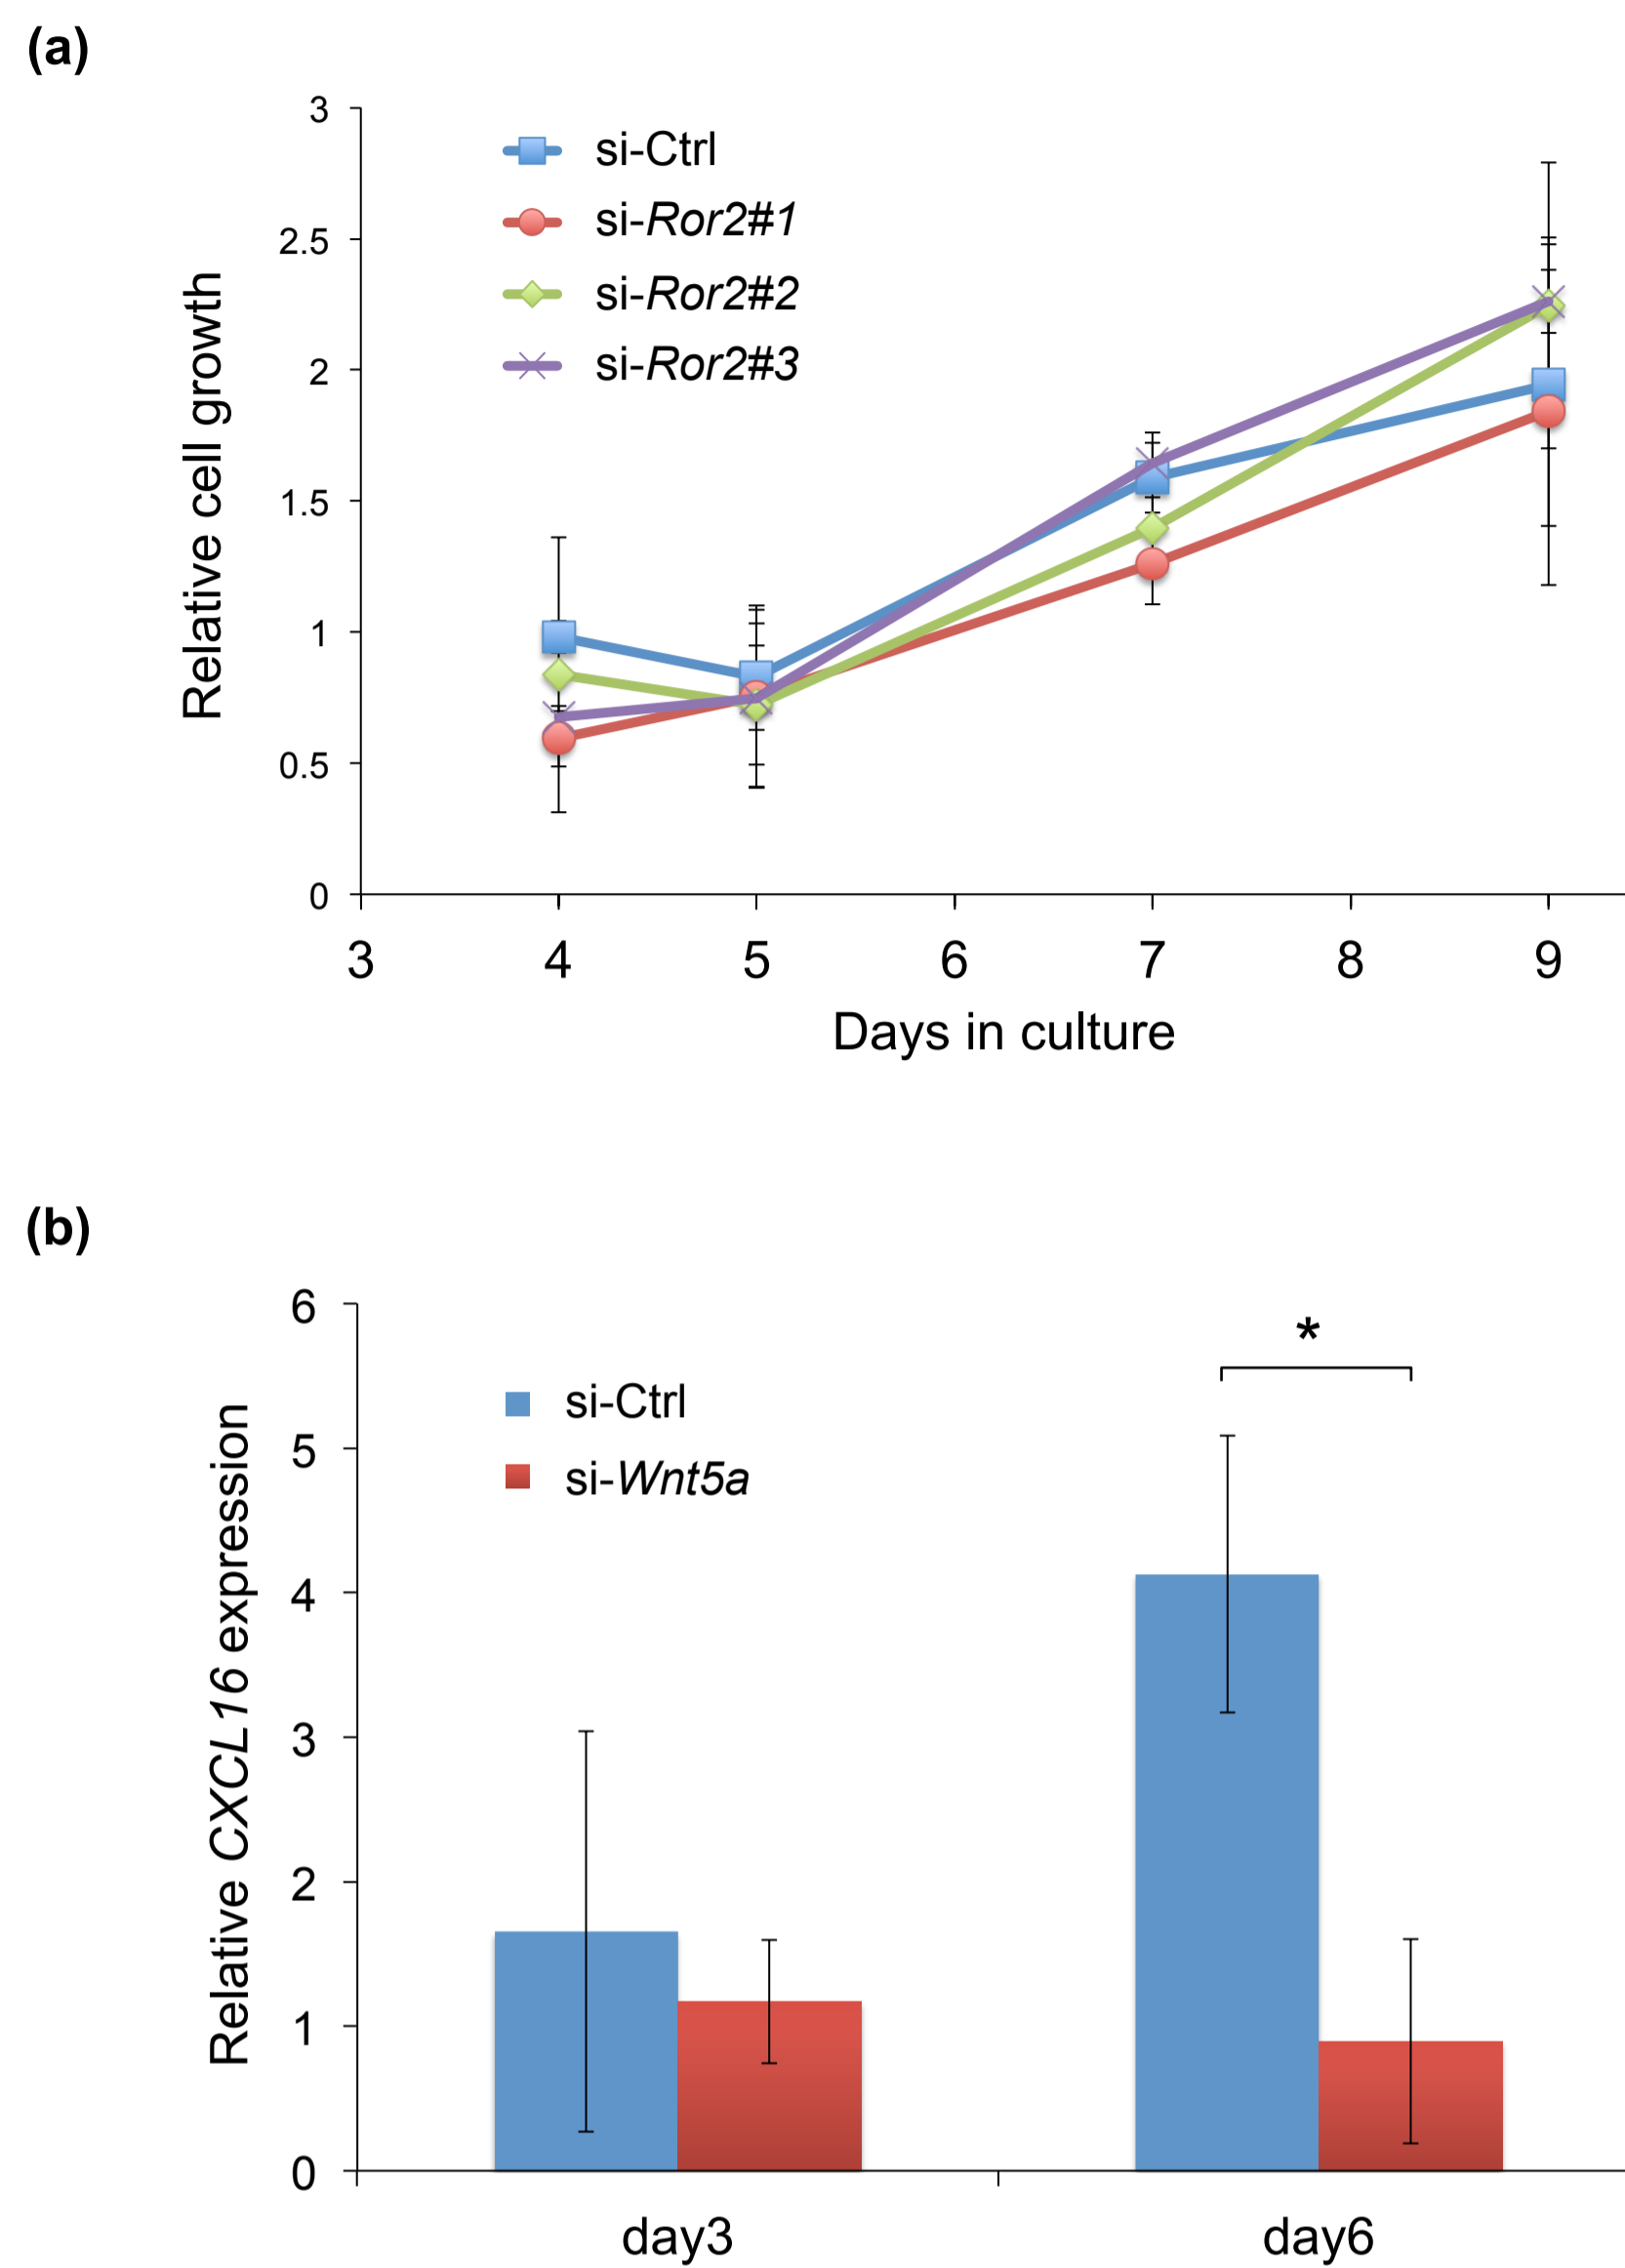

Figure S4. Effect of suppressed expression of *Ror2* or *Wnt5a* on viability of MSCs and expression of *CXCL16* in MSCs, respectively. MSCs were transfected with *ctrl* siRNA or three different siRNAs against *Ror2* (#1, #2, #3) (a). Cell viability was measured at the indicated time points by WST-8 assay. Data are expressed as mean  $\pm$  SD (n = 3). (b) Effect of suppressed expression of *Wnt5a* on expression of *CXCL16* in MSCs. MSCs were transfected with *ctrl* siRNA or siRNA against *Wnt5a*. After day 3 and day 6 in culture, mRNA levels of *CXCL16* were measured by quantitative RT-PCR analyses. Data are expressed as mean SD (n = 3; \*P < 0.05, *t* test).

Figure S5

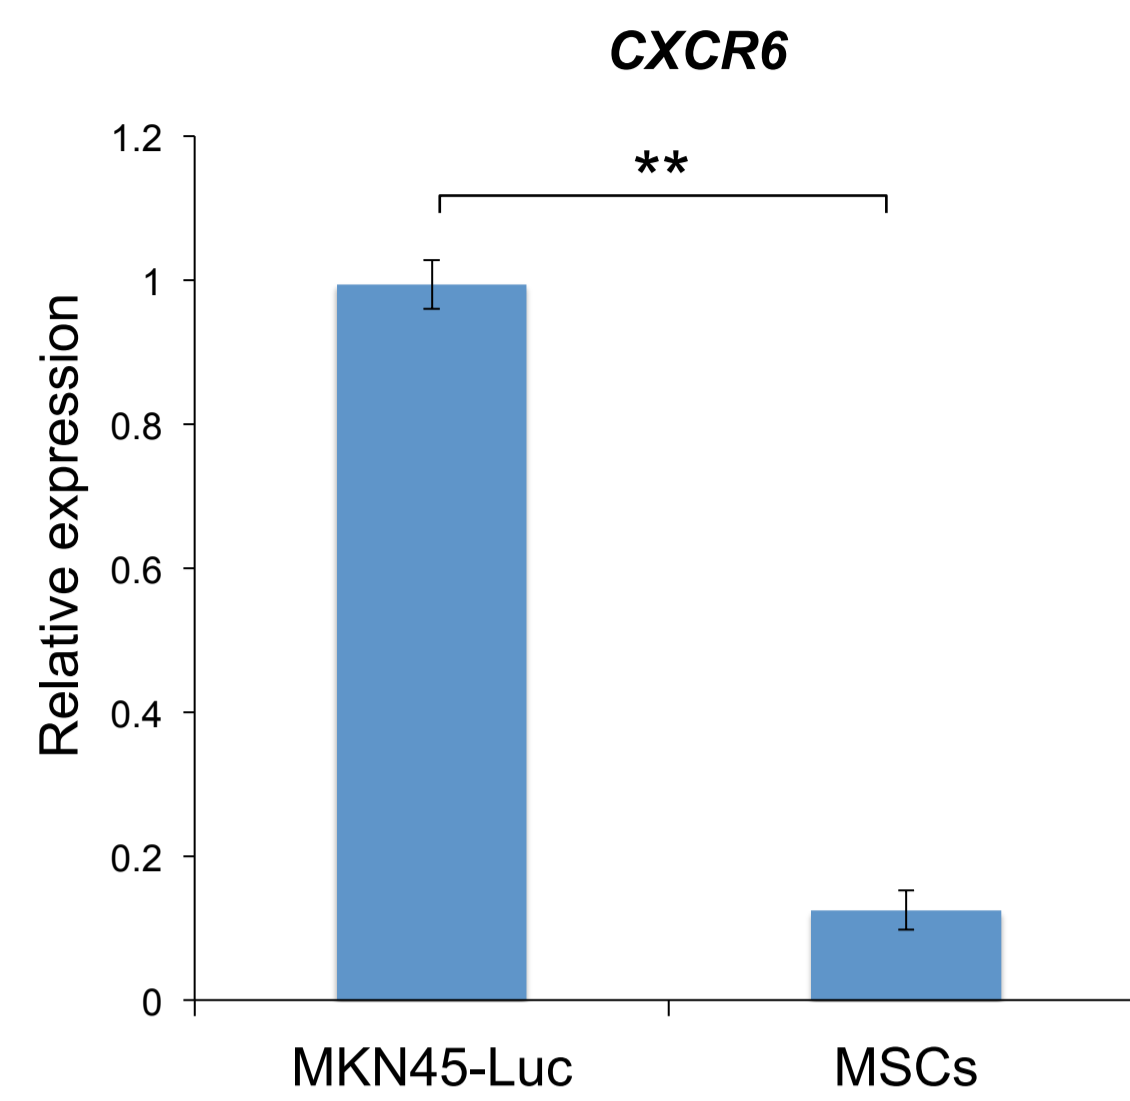

Figure S5. Expression levels of *CXCR6* in MKN45-Luc cells and MSCs. Total RNAs isolated from MKN45-Luc cells and MSCs were subjected to quantitative RT-PCR analyses. Data are expressed as mean  $\pm$  SD (n = 3; \*\*, P < 0.0001, *t* test).

Figure S6

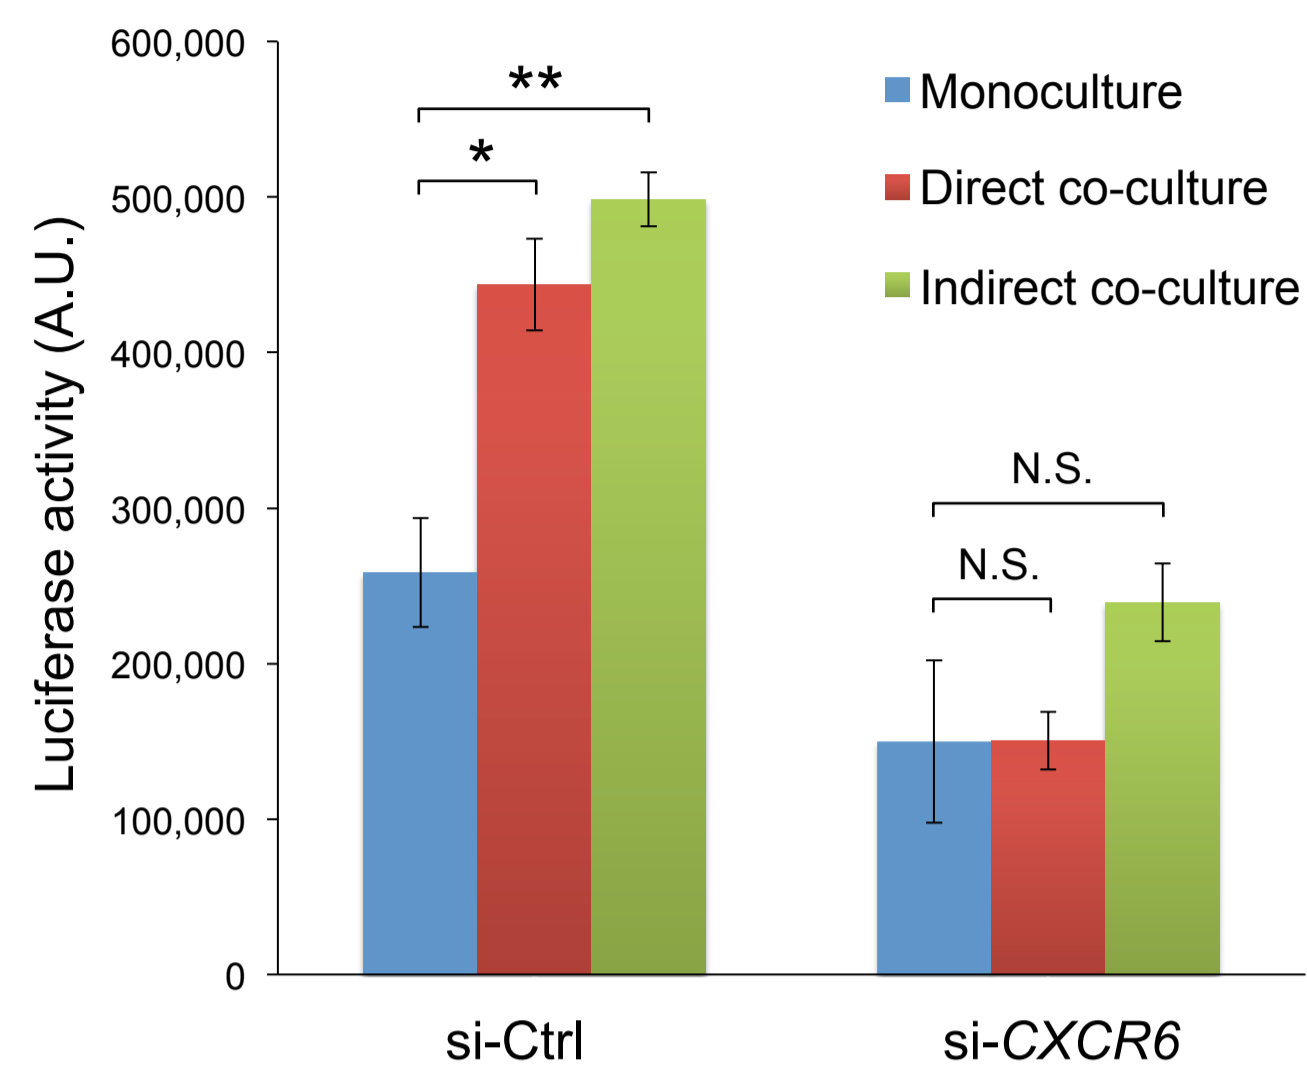

Figure S6. Effects of suppressed expression of *CXCR6* on proliferation of MKN45-Luc cells cultured singly or co-cultured with MSCs. MKN45-Luc cells transfected with either *ctrl* or *CXCR6* siRNA were cultured singly (monoculture) or co-cultured with MSCs either directly or indirectly. After 9 days in culture, luciferase activities were measured. Note that suppressed expression of *CXCR6* had only a marginal effect on proliferation of MKN45-Luc cells when cultured singly, compared with a drastic inhibition of their proliferation when co-cultured with MSCs. Data are expressed as mean  $\pm$  SD ( $n = 3$ ; \*,  $P < 0.005$ ; \*\*,  $P < 0.001$ ; n.s., not significant, *t* test).
